# Supplementary material for: A fundamental viewpoint on the hydrogen spillover phenomenon of electrocatalytic hydrogen evolution
Source: PubMed Central journal article supplement (PMC8190308; doi:10.1038/s41467-021-23750-4), 2021-06-09
Supplement: 41467_2021_23750_MOESM1_ESM.pdf [file 41467_2021_23750_MOESM1_ESM.pdf]

# Supplementary Information for

## A fundamental viewpoint on the hydrogen spillover phenomenon of electrocatalytic hydrogen evolution

Jiayuan Li<sup>1</sup>, Jun Hu<sup>2,\*</sup>, Mingkai Zhang<sup>3</sup>, Wangyan Gou<sup>1</sup>, Sai Zhang<sup>1</sup>, Zhong Chen<sup>4</sup>, Yongquan Qu<sup>1,3,\*</sup> and Yuanyuan Ma<sup>1,\*</sup>

<sup>1</sup> Key Laboratory of Special Functional and Smart Polymer Materials of Ministry of Industry and Information Technology, School of Chemistry and Chemical Engineering, Northwestern Polytechnical University, Xi'an 710072, China

<sup>2</sup> School of Chemical Engineering, Northwest University, Xi'an, P. R. China 710069

<sup>3</sup> Frontier Institute of Science and Technology, Xi'an Jiaotong University, Xi'an, 710049, China.

<sup>4</sup> School of Materials Science and Engineering, Nanyang Technological University, 50 Nanyang Avenue, Singapore 639798

### Table of content:

|                               |            |
|-------------------------------|------------|
| Supplementary Methods:        | Page 1-2   |
| Supplementary Figures 1-26    | Page 3-17  |
| Supplementary Tables 1-7      | Page 18-25 |
| Supplementary References 1-47 | Page 26-29 |

## Supplementary Methods:

**Synthesis of Pt/rGO and Pt<sub>2</sub>Ir<sub>1</sub>/rGO benchmark catalysts:** Such catalysts here were synthesized via the similar strategy mentioned above when replacing the CoP support by the commercial reduced graphene oxide (rGO, Sigma-Aldrich).

**Theoretical derivation of the Tafel slope for the Pt<sub>2</sub>Ir<sub>1</sub>/CoP catalysts:** Referring to the previous reports,<sup>1,2</sup> the HER pathway of Pt<sub>2</sub>Ir<sub>1</sub>/CoP is described by the following equations:

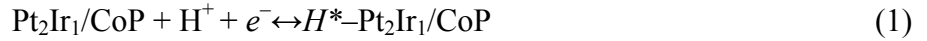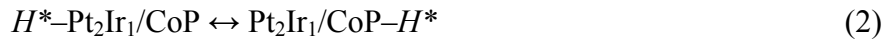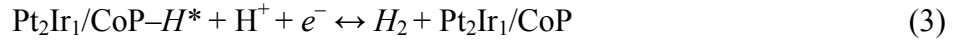

The reaction velocity of hydrogen evolution could be written as  $r = k_3\theta_{\text{CoP}-\text{H}^*}C_{\text{H}^+}$ , where  $r$  is the reaction rate;  $k$  is the rate constant;  $\theta$  is the hydrogen coverage of on active sites; and  $C_{\text{H}^+}$  is the concentration of hydrogen ion.

In the steady state,

$$\frac{d\theta_{\text{CoP}-\text{H}^*}}{dt} = k_2\theta_{\text{Pt}_2\text{Ir}_1-\text{H}^*}(1 - \theta_{\text{CoP}-\text{H}^*}) - k_{-2}\theta_{\text{CoP}-\text{H}^*}(1 - \theta_{\text{Pt}_2\text{Ir}_1-\text{H}^*}) - k_3\theta_{\text{CoP}-\text{H}^*}C_{\text{H}^+}$$

$$\frac{d\theta_{\text{Pt}_2\text{Ir}_1-\text{H}^*}}{dt} = k_1(1 - \theta_{\text{Pt}_2\text{Ir}_1-\text{H}^*})C_{\text{H}^+} - k_{-1}\theta_{\text{Pt}_2\text{Ir}_1-\text{H}^*} - k_{-2}\theta_{\text{Pt}_2\text{Ir}_1-\text{H}^*}(1 - \theta_{\text{CoP}-\text{H}^*}) + k_{-2}\theta_{\text{CoP}-\text{H}^*}(1 - \theta_{\text{Pt}_2\text{Ir}_1-\text{H}^*})$$

At the low overpotential,

$$\theta_{\text{CoP}-\text{H}^*} \approx \frac{k_2\theta_{\text{Pt}_2\text{Ir}_1-\text{H}^*}}{k_2\theta_{\text{Pt}_2\text{Ir}_1-\text{H}^*} + k_{-2} - k_{-2}\theta_{\text{Pt}_2\text{Ir}_1-\text{H}^*} + k_3C_{\text{H}^+}} \approx \frac{k_2}{k_{-2}}\theta_{\text{Pt}_2\text{Ir}_1-\text{H}^*}e^{-\frac{F\Delta\phi}{RT}}$$

$$\theta_{\text{Pt}_2\text{Ir}_1-\text{H}^*} \approx \frac{k_1C_{\text{H}^+} + k_{-2}\theta_{\text{CoP}-\text{H}^*}}{k_1C_{\text{H}^+} + k_{-1} + k_2 + k_{-2}\theta_{\text{CoP}-\text{H}^*} - k_2\theta_{\text{CoP}-\text{H}^*}} \approx \frac{k_1}{k_{-1}}C_{\text{H}^+}e^{-\frac{F\Delta\phi}{RT}}$$

Thus,

$$r \approx k_3\theta_{\text{CoP}-\text{H}^*}C_{\text{H}^+} = \frac{k_1k_2k_3}{k_{-1}k_{-2}}C_{\text{H}^+}^2e^{-\frac{(2+\alpha)F\Delta\phi}{RT}} \quad (4)$$

And,

$$-j = Fr = \frac{k_1k_2k_3}{k_{-1}k_{-2}}FC_{\text{H}^+}^2e^{-\frac{(2+\alpha)F\Delta\phi}{RT}}$$

$$\lg(-j) = \text{Constant} + 2\lg C_{\text{H}^+} - \frac{(2+\alpha)F}{2.303RT}\Delta\phi \quad (5)$$

Therefore, the derived Tafel slope for Pt<sub>2</sub>Ir<sub>1</sub>/CoP catalysts is:  $\frac{(2+\alpha)F}{2.303RT} = 0.023 \text{ V/dec}$  (assuming  $\alpha =$

0.5,  $F$  is the Faraday constant,  $R$  is the Rydberg gas constant and  $T$  is the absolute temperature).

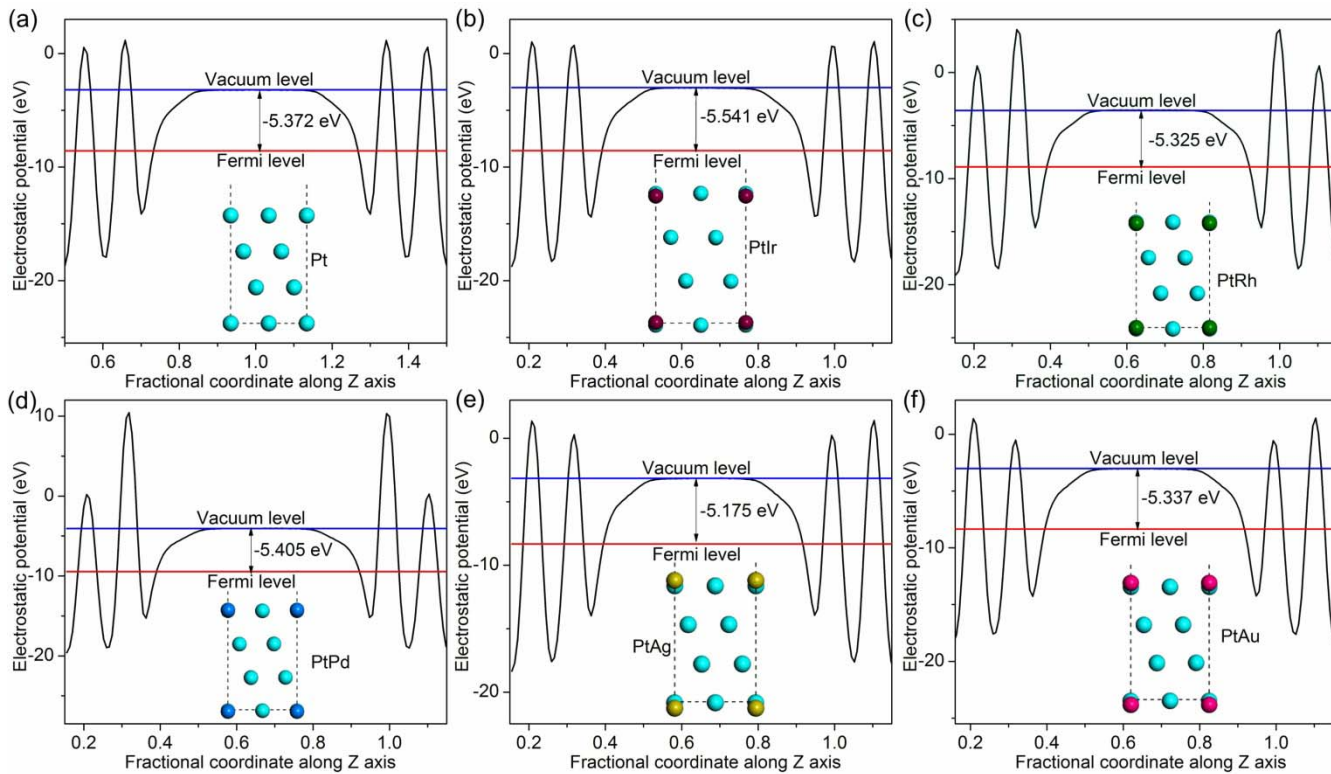

49

50 **Supplementary Figure 1.** Work function estimation for various PtM alloys by DFT calculations, where  
 51 M = Pt **(a)**, Ir **(b)**, Rh **(c)**, Pd **(d)**, Ag **(e)** and Au **(f)**.

52

53

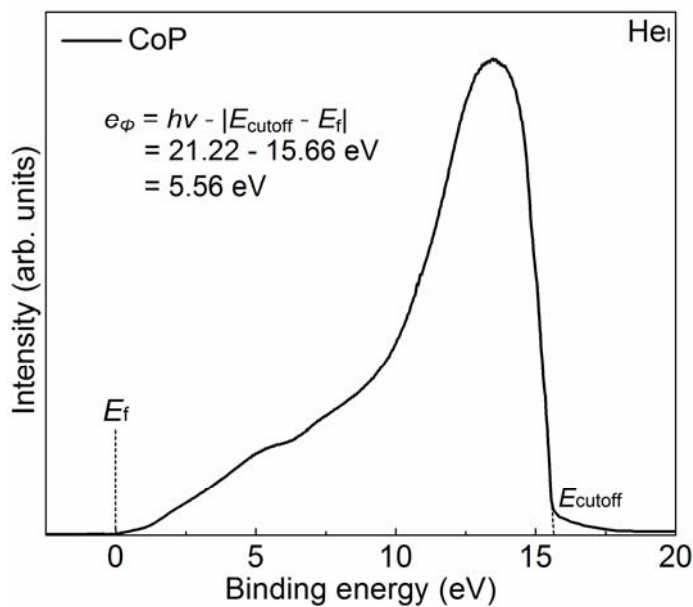

54

55

**Supplementary Figure 2.** Work function estimation for CoP by UPS analysis.

56

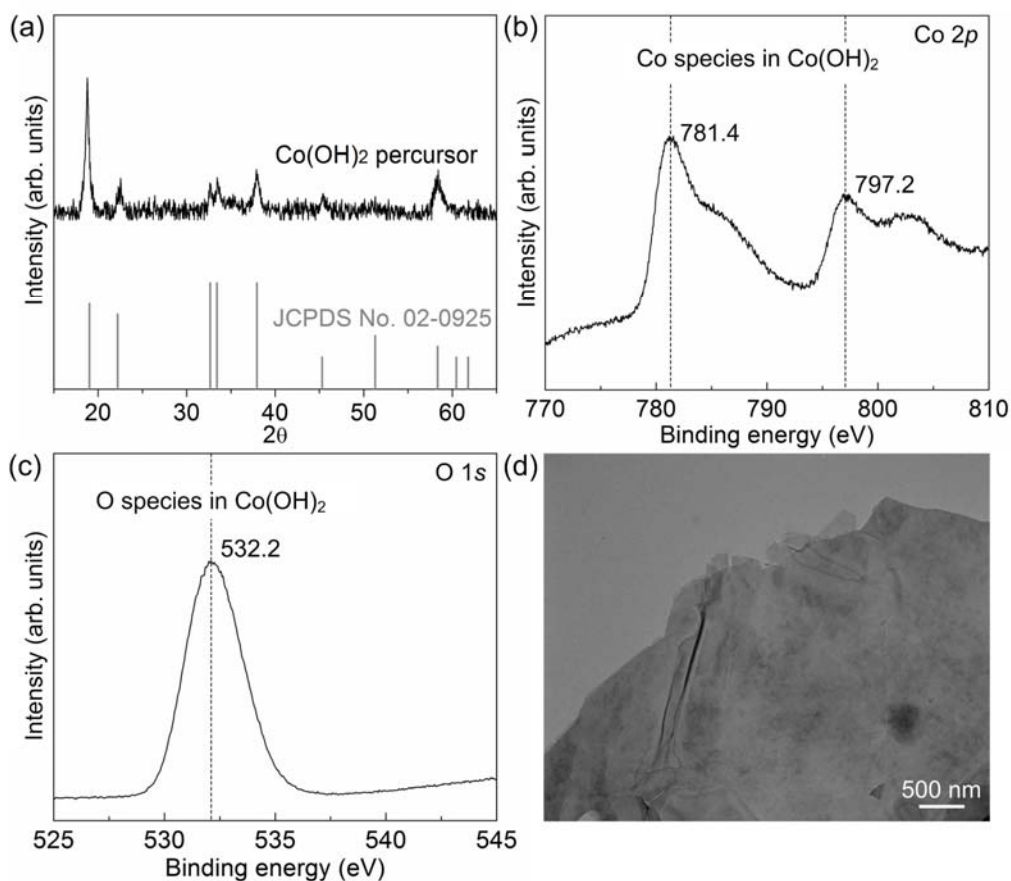

58

59 **Supplementary Figure 3. Characterizations of Co(OH)<sub>2</sub> precursors.** (a) XRD pattern. (b) High-  
 60 resolution XPS spectra in Co 2p (b) and O 1s (c) region. (d) TEM image. XRD pattern of the product is  
 61 consistent with that of Co(OH)<sub>2</sub> standard (JCPDS #02-0925), suggesting the successful synthesis of  
 62 Co(OH)<sub>2</sub> precursors. In the high-resolution XPS of the product, the typical signals of Co and O species  
 63 in Co(OH)<sub>2</sub> were identified, further confirming the formation of Co(OH)<sub>2</sub> precursors.<sup>3</sup> TEM image  
 64 clearly demonstrates the morphology of nanosheet for the Co(OH)<sub>2</sub> precursors.

65

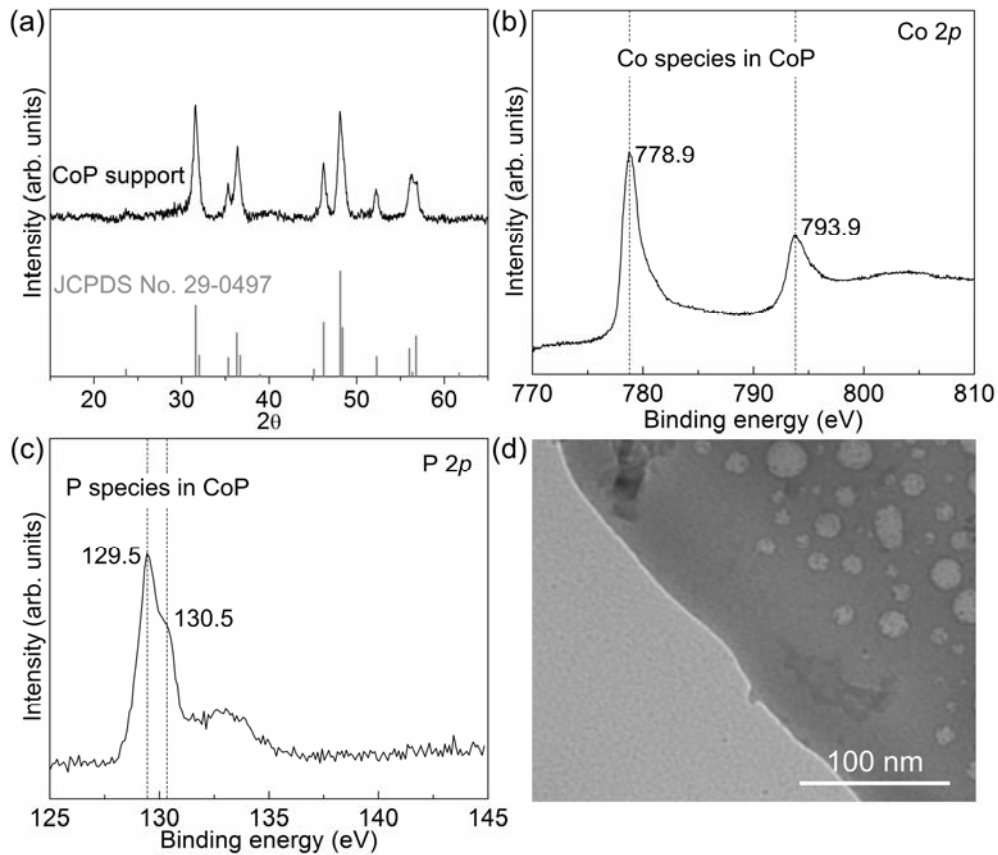

66

67

68

69

70

71

72

73

74

**Supplementary Figure 4. Characterizations for CoP.** (a) XRD pattern. (b) High-resolution XPS spectra in Co 2p (b) and P 2p (c) region. (d) TEM image. XRD pattern of the product is consistent with that of CoP standard (JCPDS # 29-0497), suggesting the successful synthesis of CoP. In the high-resolution XPS of the product, the typical signals of Co and P species in CoP were identified, further confirming the formation of CoP.<sup>4</sup> TEM image demonstrates the morphology of nanosheet for the CoP support.

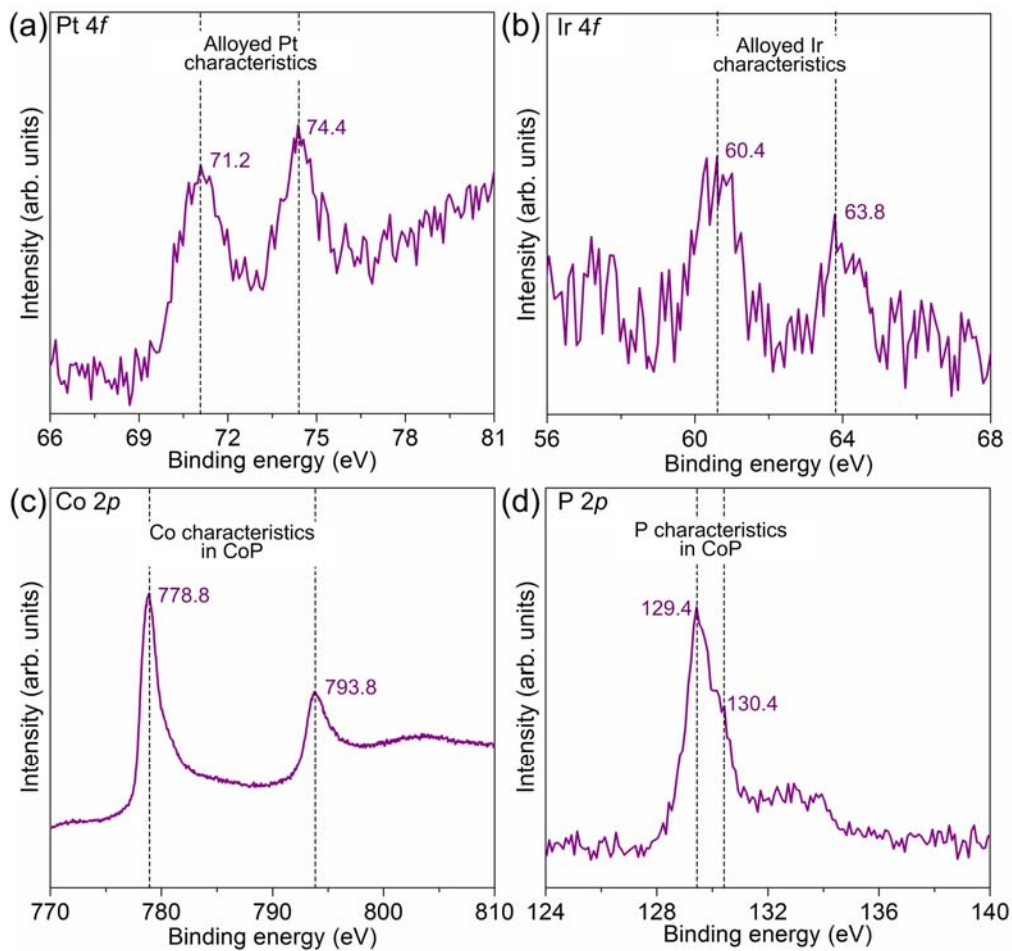

75

76 **Supplementary Figure 5.** High-resolution XPS spectra in (a) Pt 4*f*, (b) Ir 4*f*, (c) Co 2*p* and (d) P 2*p* re-  
 77 gion for the Pt<sub>2</sub>Ir<sub>1</sub>/CoP catalysts.

78

79

80

81

82

83

84

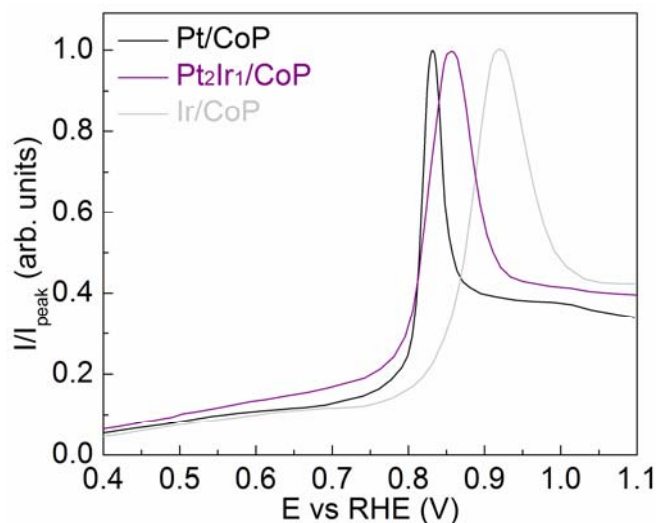

85

86 **Supplementary Figure 6.** CO stripping voltammetry of the Pt/CoP, Pt<sub>2</sub>Ir<sub>1</sub>/CoP and Ir/CoP catalysts in  
 87 0.5 M H<sub>2</sub>SO<sub>4</sub> at scan rate of 20 mV/s. The CO was pre-adsorbed at 0.05 V vs. RHE for 15 min in each  
 88 experiment. The CO stripping currents were normalized to each other. Thus, all of the peaks have the  
 89 same magnitude to compare the CO stripping peak characteristics. For Pt/CoP and Ir/CoP, the CO strip-  
 90 ping peaks were centered at 0.83 and 0.93 V vs. RHE, respectively, consistent with the previous report.<sup>5</sup>  
 91 The much more positive CO stripping peak and much larger full width at half maximum (FWHM) for  
 92 Ir/CoP over those for Pt/CoP could be explained as arising from the higher desorption activation energy  
 93 of CO from Ir (22 kcal/mol) compared to that from Pt (13 kcal/mol).<sup>6</sup> If no Pt-Ir alloy is formed in the  
 94 Pt<sub>2</sub>Ir<sub>1</sub>/CoP catalysts, the CO stripping voltammograms should show two clear peaks, centered at the po-  
 95 tentials seen for the Pt/CoP and Ir/CoP catalysts alone.<sup>5</sup> Herein, the single CO stripping peak at 0.88 V  
 96 vs RHE with moderate FWHM for the Pt<sub>2</sub>Ir<sub>1</sub>/CoP clearly demonstrated the formation of alloyed Pt<sub>2</sub>Ir<sub>1</sub>  
 97 with the regulated overall CO adsorption strength rather than the formation of only individual Pt and Ir.<sup>5</sup>  
 98

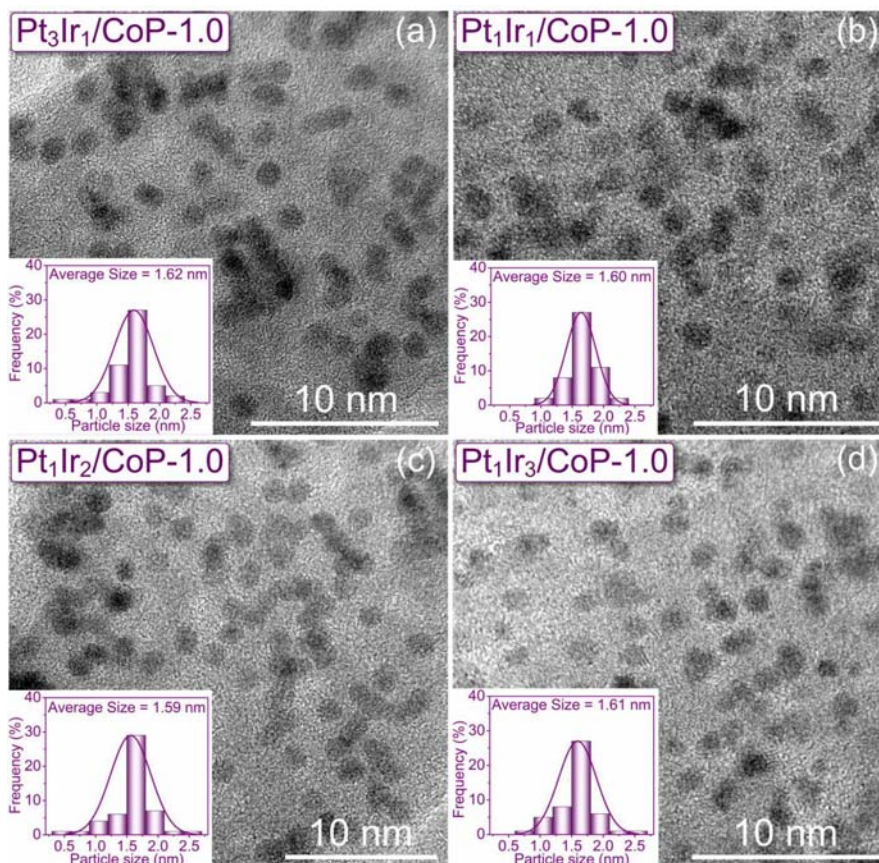

99

100 **Supplementary Figure 7.** TEM images for (a) Pt<sub>3</sub>Ir<sub>1</sub>/CoP, (b) Pt<sub>1</sub>Ir<sub>1</sub>/CoP, (c) Pt<sub>1</sub>Ir<sub>2</sub>/CoP and (d)  
 101 Pt<sub>1</sub>Ir<sub>3</sub>/CoP at metal loading of 1.0 wt%. The insets show the size distributions of the loaded metal nano-  
 102 particles.

103

104

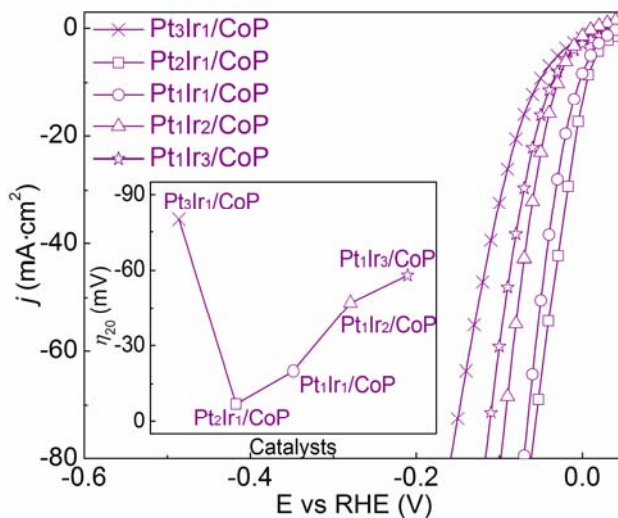

105

106 **Supplementary Figure 8.** HER performance for the PtIr/CoP catalysts with different molar ratio of Pt  
 107 and Ir.



108  
109  
110  
111  
112

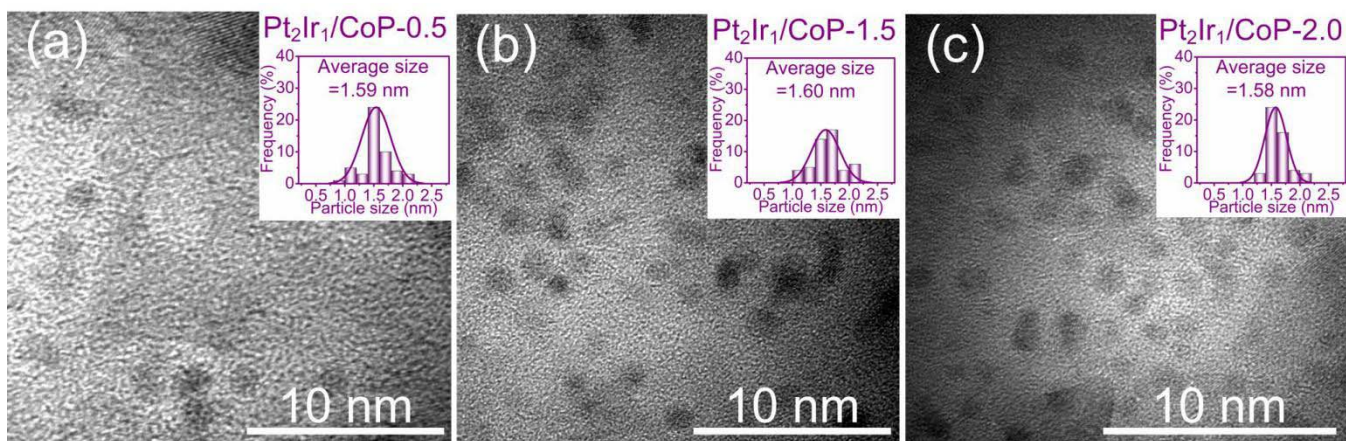

113  
114  
115  
116  
117  
118  
119

**Supplementary Figure 9.** TEM images for the Pt<sub>2</sub>Ir<sub>1</sub>/CoP catalysts at various metal loadings of (a) ~ 0.5 wt%, (b) ~ 1.5 wt% and (c) ~ 2.0 wt%. The insets show the size distributions of the loaded metal nanoparticles.

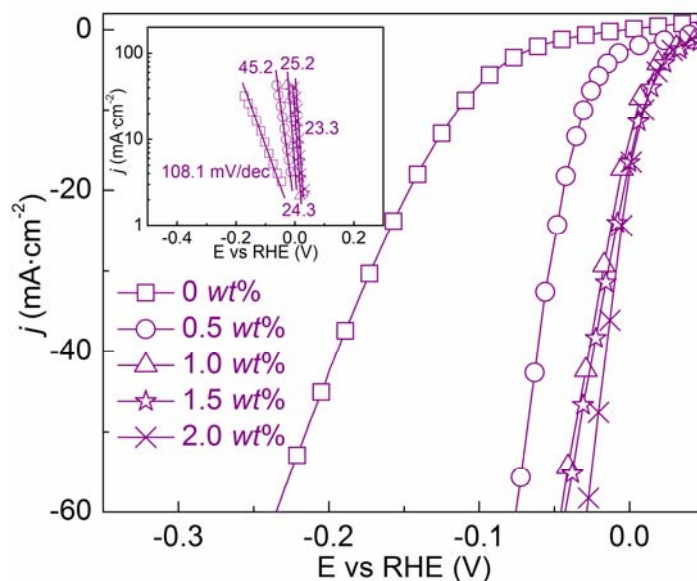

120  
121  
122  
123

**Supplementary Figure 10.** HER performance for the Pt<sub>2</sub>Ir<sub>1</sub>/CoP catalysts at different metal loading.

124

125

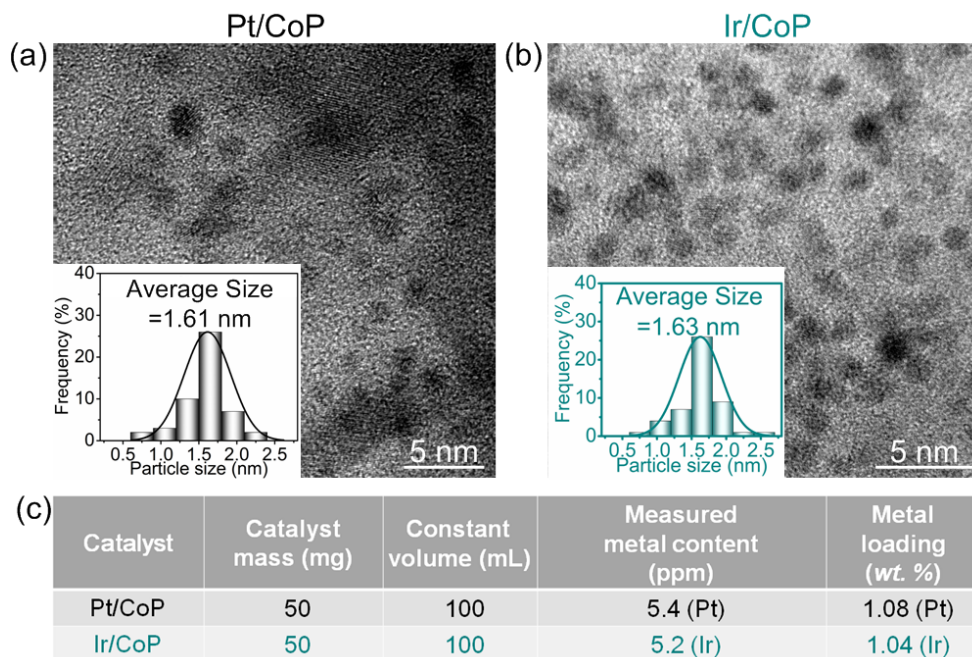

126

127 **Supplementary Figure 11.** TEM images for the (a) Pt/CoP and (b) Ir/CoP at metal loading of ~ 1.0  
 128 wt%. (c) ICP analysis for the Pt/CoP and Ir/CoP catalysts.

129

130

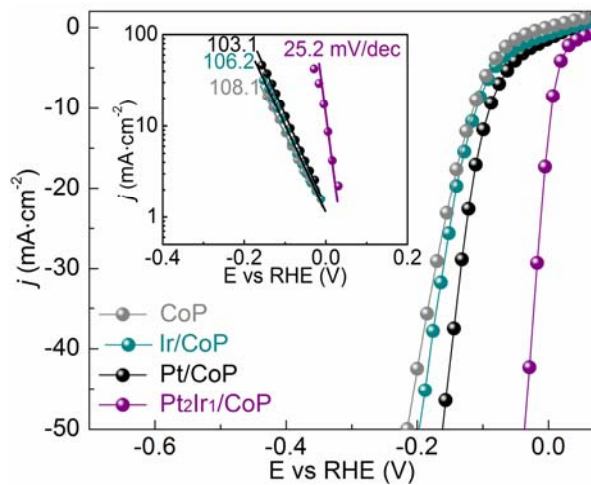

131

132 **Supplementary Figure 12.** HER performance for the Pt/CoP, Ir/CoP and Pt<sub>2</sub>Ir<sub>1</sub>/CoP catalysts.

133

134

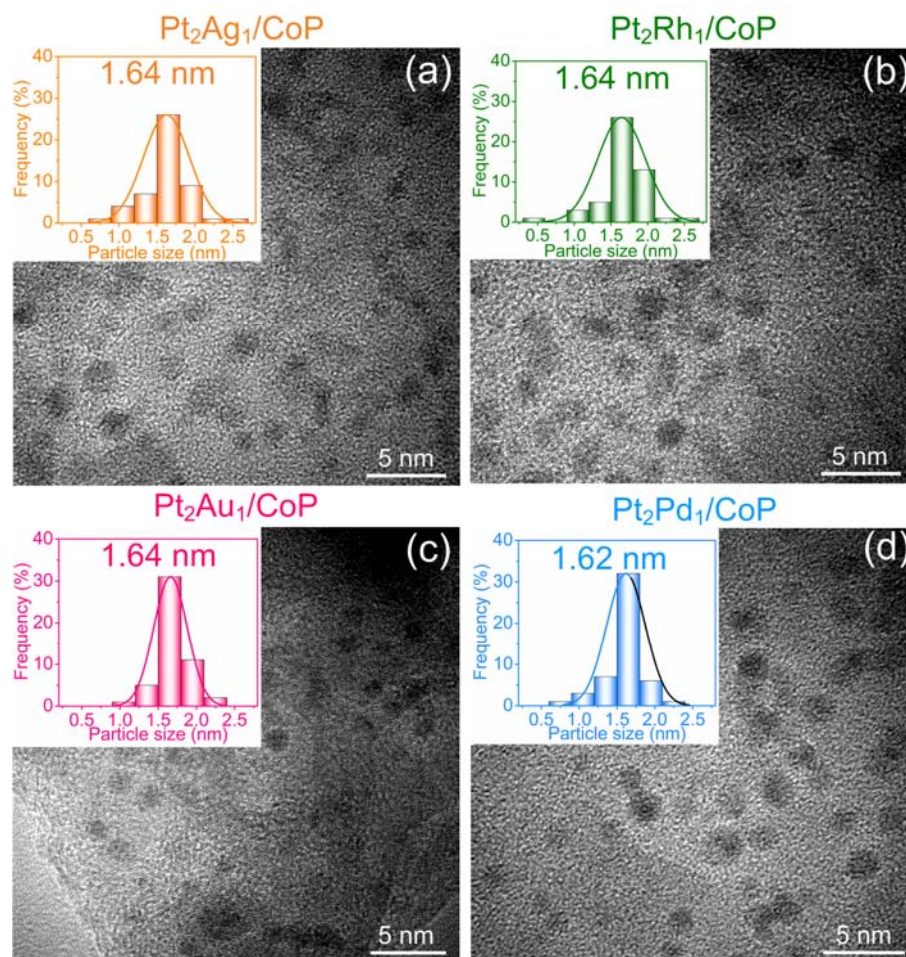

135

136 **Supplementary Figure 13.** TEM images of the (a) Pt<sub>2</sub>Ag<sub>1</sub>/CoP, (b) Pt<sub>2</sub>Rh<sub>1</sub>/CoP, (c) Pt<sub>2</sub>Au<sub>1</sub>/CoP and (e)  
 137 Pt<sub>2</sub>Pd<sub>1</sub>/CoP catalysts at the metal loading of 1.0 wt%. The insets show the size distributions of the load-  
 138 ed metal nanoparticles.

139

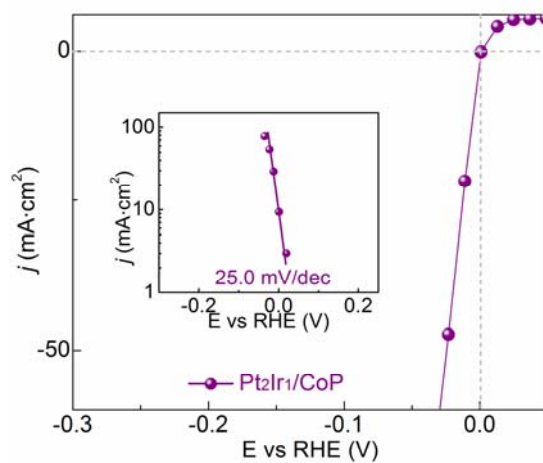

140

141 **Supplementary Figure 14.** HER performance of the Pt<sub>2</sub>Ir<sub>1</sub>/CoP catalysts in H<sub>2</sub>-saturated 0.5 M H<sub>2</sub>SO<sub>4</sub>  
 142 electrolyte.

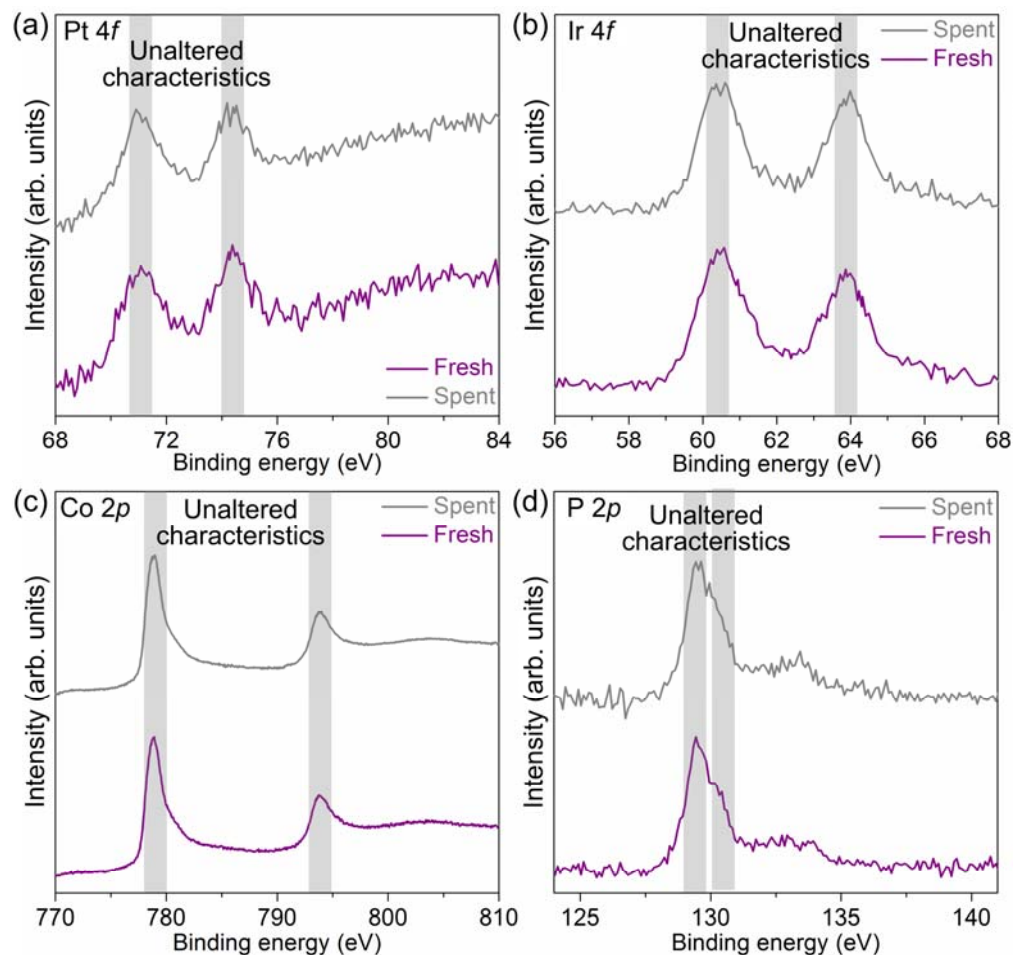

143

144 **Supplementary Figure 15.** High-resolution XPS spectra in (a) Pt 4f, (b) Ir 4f, (c) Co 2p and (d) P 2p

145 region for the fresh and spent Pt<sub>2</sub>Ir<sub>1</sub>/CoP catalysts.

146

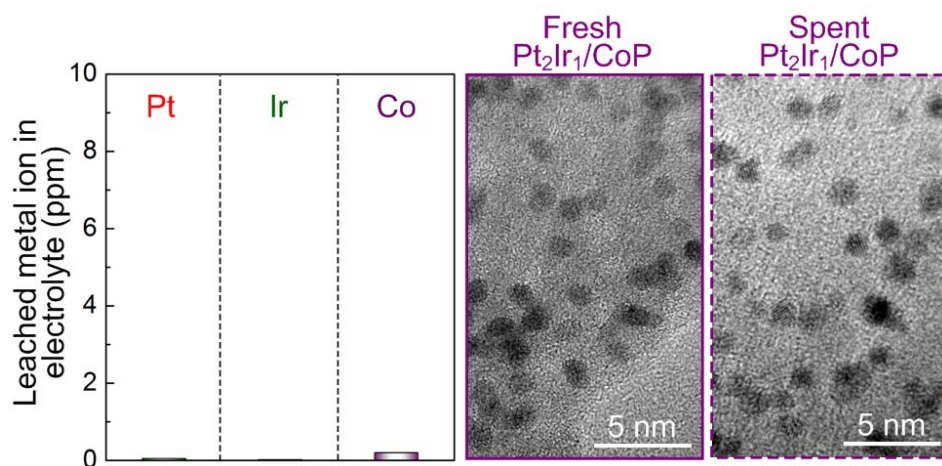

147

148 **Supplementary Figure 16.** Durability analysis for the Pt<sub>2</sub>Ir<sub>1</sub>/CoP catalysts. The ICP (left) and TEM

149 (right) results show the negligible leaching of catalyst composition and morphology change during HER

150 operation.

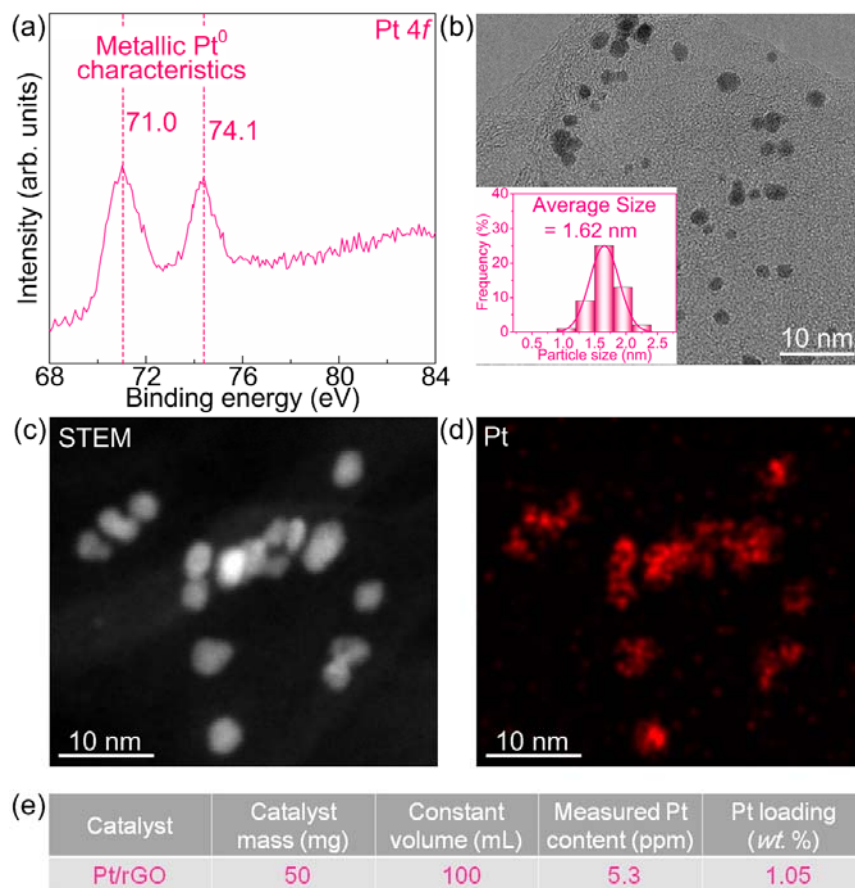

151

152 **Supplementary Figure 17. Characterizations of Pt/rGO.** (a) High-resolution XPS spectrum in Pt 4f

153 region. (b) TEM images. Inset is the size distribution of Pt. (c) STEM images and (d) EDX mapping. (e)

154 ICP-MS analysis.

155

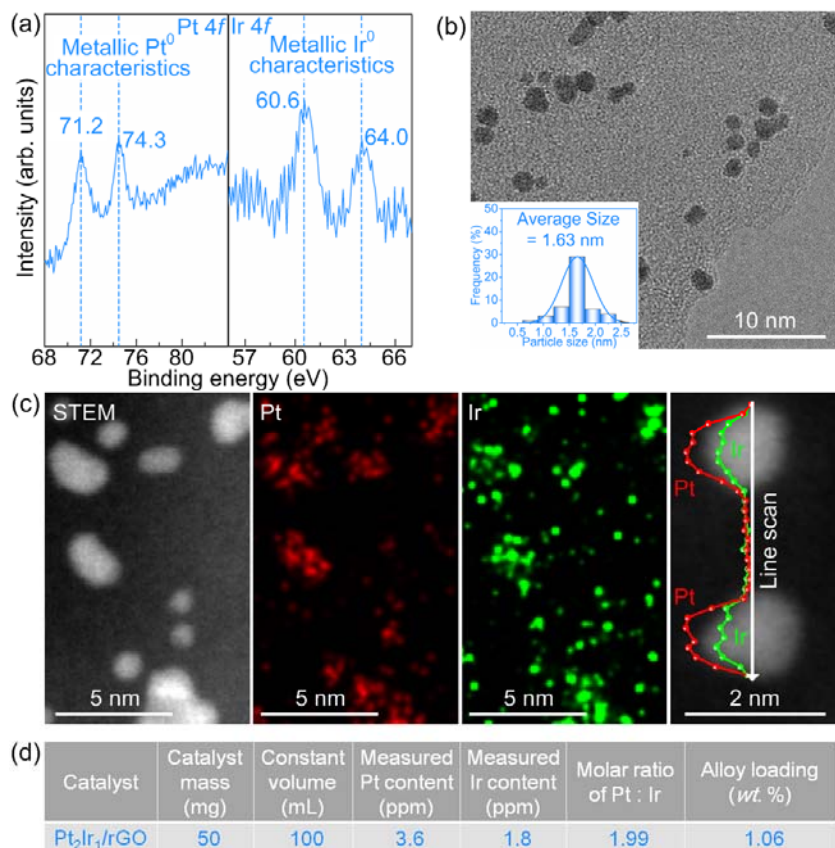

156

157 **Supplementary Figure 18. Characterizations of Pt<sub>2</sub>Ir<sub>1</sub>/rGO.** (a) High-resolution XPS spectra in Pt 4f  
 158 and Ir 4f region. (b) TEM image. Inset is the size distribution of Pt<sub>2</sub>Ir<sub>1</sub>. (c) STEM images, EDX mapping  
 159 and line scan. (d) ICP-MS analysis.

160

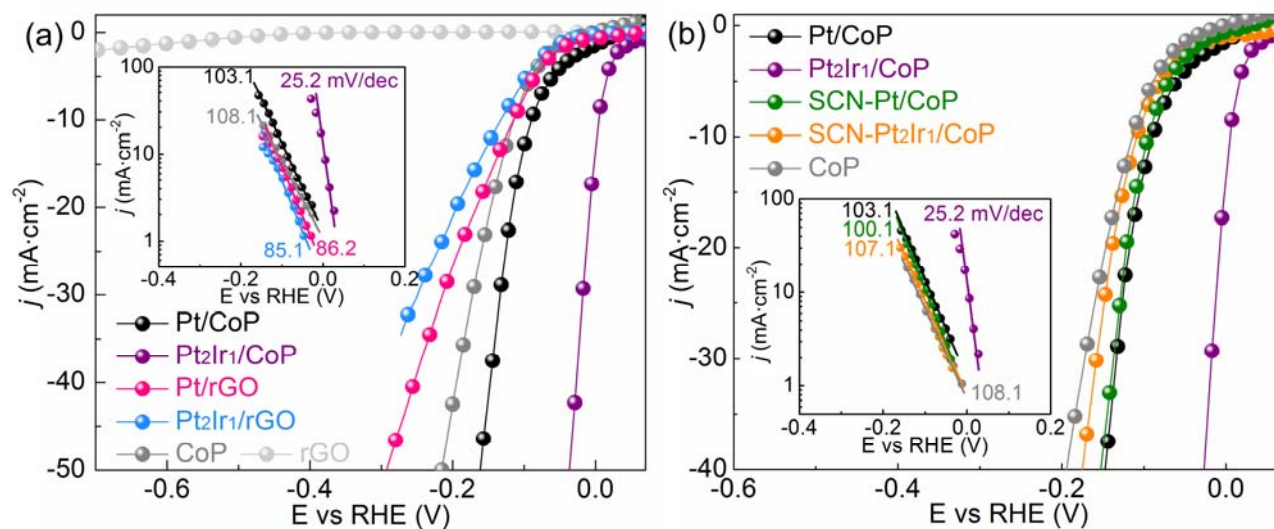

161

162 **Supplementary Figure 19. Catalytic contribution analysis in Ar-saturated 0.5 M H<sub>2</sub>SO<sub>4</sub>.** (a) HER  
 163 performance of Pt/CoP, Pt<sub>2</sub>Ir<sub>1</sub>/CoP, Pt/rGO and Pt<sub>2</sub>Ir<sub>1</sub>/rGO. (b) HER performance of Pt/CoP and  
 164 Pt<sub>2</sub>Ir<sub>1</sub>/CoP catalysts in the presence or absence of SCN<sup>-</sup> probe.

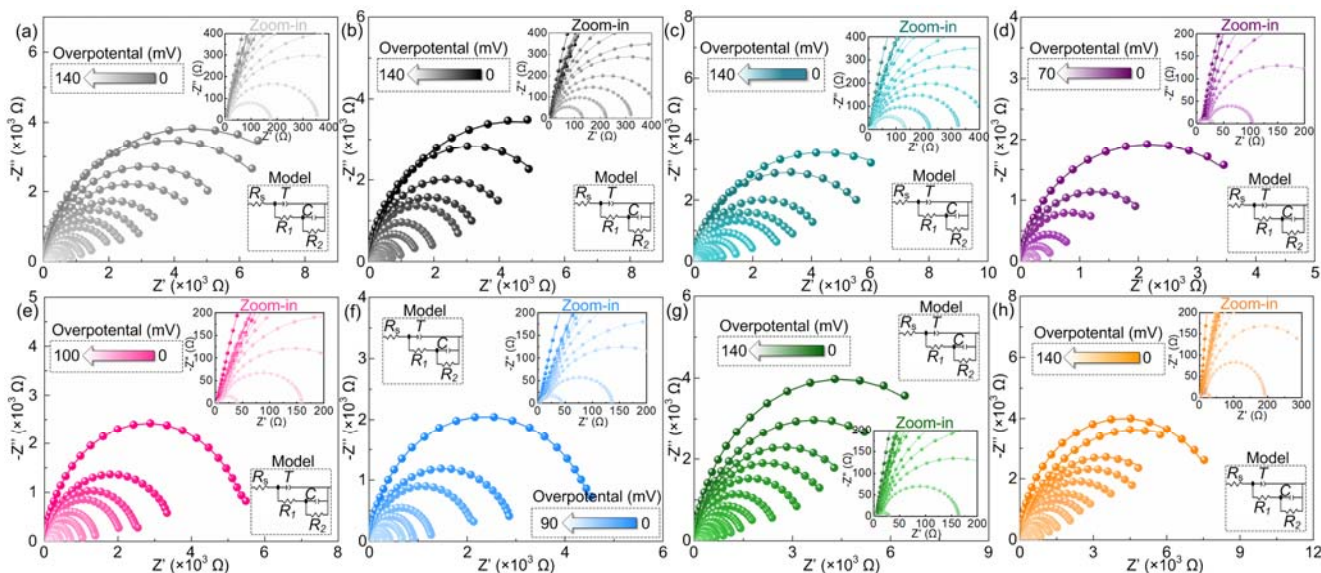

165

166

**Supplementary Figure 20. Electrochemical impedance spectra analysis in Ar-saturated 0.5 M**

167 **H<sub>2</sub>SO<sub>4</sub>.** Nyquist plots for (a) bare CoP, (b) Pt/CoP, (c) Ir/CoP, (d) Pt<sub>2</sub>Ir<sub>1</sub>/CoP, (e) Pt/rGO, (f) Pt<sub>2</sub>Ir<sub>1</sub>/rGO,

168 (g) SCN-Pt/CoP and (h) SCN-Pt<sub>2</sub>Ir<sub>1</sub>/CoP catalysts at various HER overpotentials. Zoom-in parts were

169 correspondingly presented as inset. The scattered symbols represent the experimental results, and the

170 solid lines are simulated fitting results. The inset also shows the equivalent circuit for the simulation.

171 The fitted parameters are summarized in Table S7.

172

173

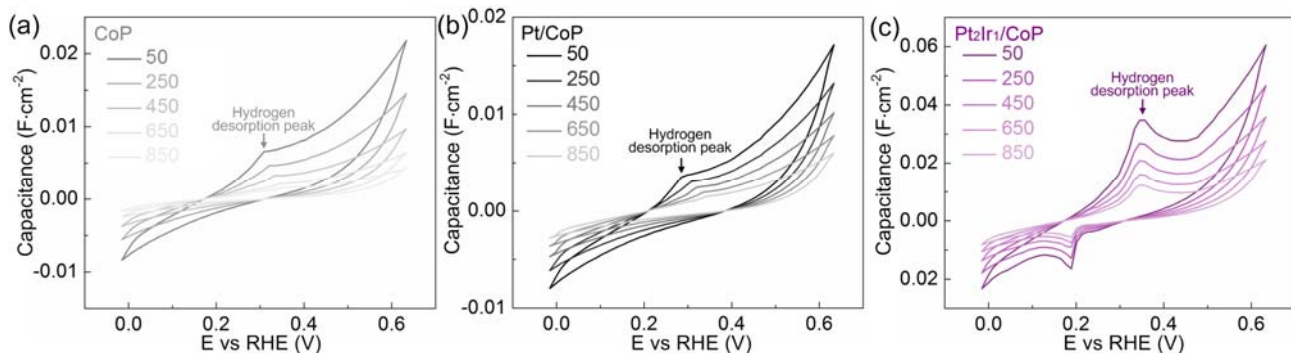

174

175

**Supplementary Figure 21. Capacitance vs. voltage profiles obtained from cyclic voltammograms of (a)**

176 **bare CoP, (b) Pt/CoP and (c) Pt<sub>2</sub>Ir<sub>1</sub>/CoP catalysts with the scan rate from 50 to 850 mV·s<sup>-1</sup> in Ar-**

177 **saturated 0.5 M H<sub>2</sub>SO<sub>4</sub>.**

178

179

180

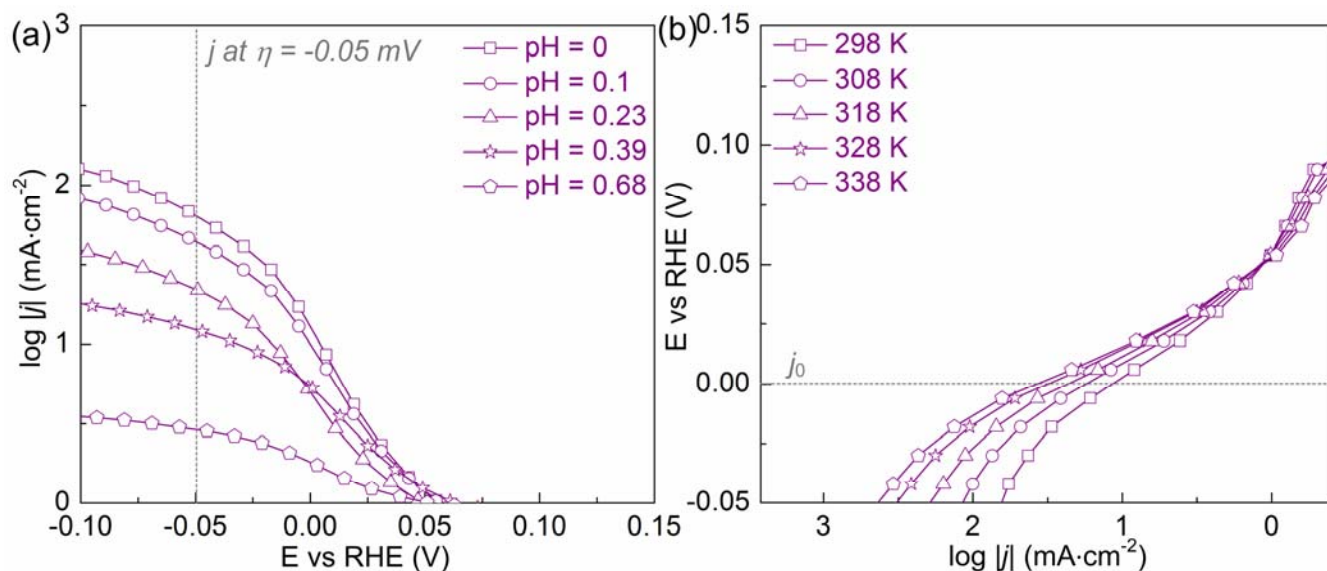

181

182 **Supplementary Figure 22.** (a) Tafel curves of Pt<sub>2</sub>Ir<sub>1</sub>/CoP catalysts in Ar-saturated H<sub>2</sub>SO<sub>4</sub> with pH  
 183 ranging from 0 to 0.68. (b) Tafel curves of Pt<sub>2</sub>Ir<sub>1</sub>/CoP catalysts in Ar-saturated 0.5 M H<sub>2</sub>SO<sub>4</sub> at different  
 184 temperatures ranging from 298 to 338 K.

185

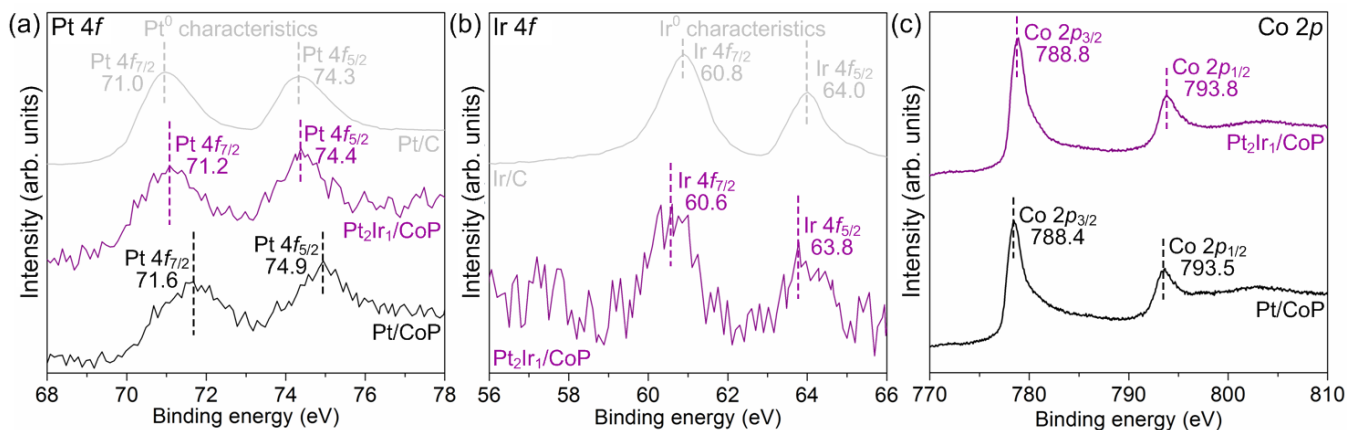

186

187 **Supplementary Figure 23.** High-resolution XPS spectra in (a) Pt 4*f*, (b) Ir 4*f* and (c) Co 2*p* region of  
 188 the Pt/CoP and Pt<sub>2</sub>Ir<sub>1</sub>/CoP catalysts. Compared with Pt/CoP, the XPS peaks of Pt 4*f*<sub>7/2</sub> and Pt 4*f*<sub>5/2</sub> for  
 189 Pt<sub>2</sub>Ir<sub>1</sub>/CoP shift to the low binding energy, while its XPS peaks of Co 2*p*<sub>3/2</sub> and Co 2*p*<sub>2/1</sub> shift to the high  
 190 binding energy. In addition, the XPS peaks of Pt 4*f*<sub>7/2</sub> (71.2 eV) and Pt 4*f*<sub>5/2</sub> (74.4 eV) for Pt<sub>2</sub>Ir<sub>1</sub>/CoP is  
 191 close to the characters of the Pt<sup>0</sup> (Pt 4*f*<sub>7/2</sub> = 71.0 eV and Pt 4*f*<sub>5/2</sub> = 74.3 eV) in Pt/C benchmark, while its  
 192 XPS peaks of Ir 4*f*<sub>7/2</sub> (60.6 eV) and Ir 4*f*<sub>5/2</sub> (63.8 eV) is close to the characters of the Ir<sup>0</sup> (Ir 4*f*<sub>7/2</sub> = 60.8  
 193 eV and Ir 4*f*<sub>5/2</sub> = 64.0 eV) in Ir/C benchmark.

194

195

196



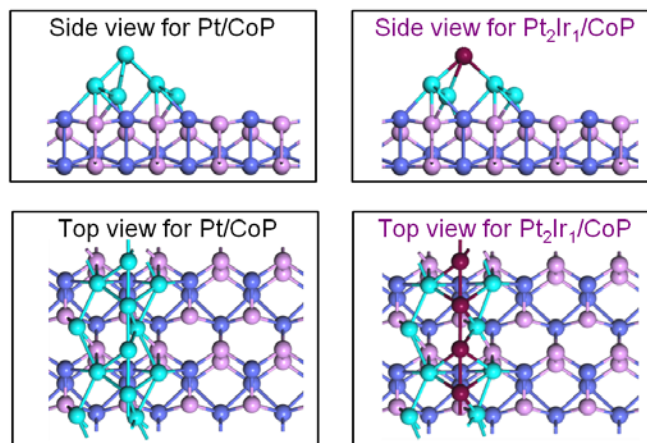

197  
198 **Supplementary Figure 24.** Side and top view of Pt/CoP and Pt<sub>2</sub>Ir<sub>1</sub>/CoP surfaces.  
199

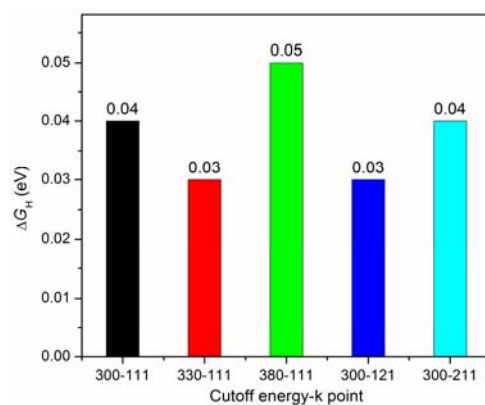

200  
201 **Supplementary Figure 25.** The  $\Delta G_H$  values of site 4 on Pt/CoP surface in different cutoff energy and  
202 k-point. The results show there are no obvious difference for the adsorption thermodynamics calculation  
203 in different cases.  
204

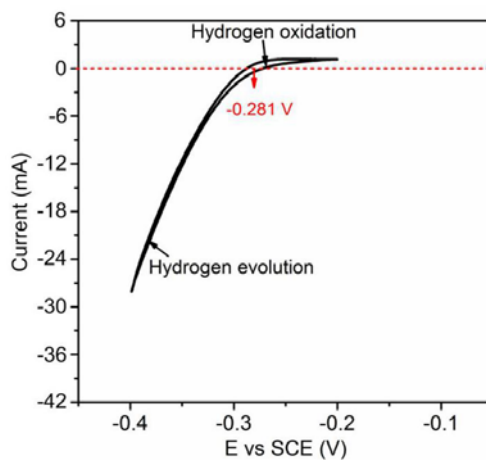

205  
206 **Supplementary Figure 26.** The cyclic voltammetry result of RHE calibration in 0.5 M H<sub>2</sub>SO<sub>4</sub>,  
207  $E(\text{RHE}) = E(\text{SCE}) + 0.281 \text{ V}$ .

208 **Supplementary Table 1.** ICP-MS analysis of series of PtIr/CoP catalysts.

| Catalyst                             | Alloy loading [wt.%] | Pt loading [wt.%] | Ir loading [wt.%] | Molar ratio of Pt : Ir |
|--------------------------------------|----------------------|-------------------|-------------------|------------------------|
| Pt <sub>3</sub> Ir <sub>1</sub> /CoP | 1.03                 | 0.77              | 0.26              | 2.97                   |
| Pt <sub>2</sub> Ir <sub>1</sub> /CoP | 0.99                 | 0.67              | 0.32              | 2.04                   |
| Pt <sub>1</sub> Ir <sub>1</sub> /CoP | 1.01                 | 0.51              | 0.50              | 0.99                   |
| Pt <sub>1</sub> Ir <sub>2</sub> /CoP | 1.05                 | 0.34              | 0.71              | 0.48                   |
| Pt <sub>1</sub> Ir <sub>3</sub> /CoP | 1.03                 | 0.25              | 0.78              | 0.31                   |

209

210

211

212

**Supplementary Table 2.** ICP-MS analysis of the Pt<sub>2</sub>Ir<sub>1</sub>/CoP catalysts with different metal loading.

| Catalyst                                 | Alloy loading [wt.%] | Pt loading [wt.%] | Ir loading [wt.%] | Molar ratio of Pt : Ir |
|------------------------------------------|----------------------|-------------------|-------------------|------------------------|
| Pt <sub>2</sub> Ir <sub>1</sub> /CoP-0.5 | 0.47                 | 0.32              | 0.15              | 2.09                   |
| Pt <sub>2</sub> Ir <sub>1</sub> /CoP-1.0 | 1.04                 | 0.81              | 0.23              | 2.01                   |
| Pt <sub>2</sub> Ir <sub>1</sub> /CoP-1.5 | 1.51                 | 1.0               | 0.51              | 1.97                   |
| Pt <sub>2</sub> Ir <sub>1</sub> /CoP-2.0 | 1.97                 | 1.32              | 0.65              | 2.02                   |

213

214

215

216

**Supplementary Table 3.** ICP-MS analysis of series of PtM/CoP catalysts.

| Catalyst                             | Alloy loading [wt.%] | Pt loading [wt.%] | Foreign metal loading [wt.%] | Molar ratio of Pt :foreign metal |
|--------------------------------------|----------------------|-------------------|------------------------------|----------------------------------|
| Pt <sub>2</sub> Rh <sub>1</sub> /CoP | 1.05                 | 0.83              | 0.22 (Rh)                    | 1.98 (Pt : Rh)                   |
| Pt <sub>2</sub> Pd <sub>1</sub> /CoP | 1.04                 | 0.81              | 0.23 (Pd)                    | 2.01 (Pt : Pd)                   |
| Pt <sub>2</sub> Ag <sub>1</sub> /CoP | 1.0                  | 0.78              | 0.22 (Ag)                    | 2.0 (Pt : Ag)                    |
| Pt <sub>2</sub> Au <sub>1</sub> /CoP | 0.98                 | 0.64              | 0.34 (Au)                    | 2.06 (Pt : Au)                   |

217

218

219

220

221

222

223

224

225

226

227

**Supplementary Table 4.** Comparison of HER performance in acidic media for Pt<sub>2</sub>Ir<sub>1</sub>/CoP with the earth-abundant and noble metal-based HER catalysts, especially the single-atom Pt catalysts.

| Catalyst                                                          | Loading of noble metal [ $\mu\text{g}/\text{cm}^2$ ] | Size of noble metal | $\eta_{20}$ [mV] | Tafel slope [mV/dec] | Durability   | Suppl. Ref. |
|-------------------------------------------------------------------|------------------------------------------------------|---------------------|------------------|----------------------|--------------|-------------|
| Pt <sub>2</sub> Ir <sub>1</sub> /CoP                              | 0.6                                                  | ~ 1.6 nm            | 7                | 25.2                 | 500 h        | This work   |
| Ni <sub>2</sub> P NPs                                             | 0                                                    | –                   | 130              | 46                   | –            | Ref. 7      |
| CoP NWs                                                           | 0                                                    | –                   | 100              | 51                   | 22 h         | Ref. 8      |
| Co-Fe-P 3D electrode                                              | 0                                                    | –                   | 80               | 45                   | –            | Ref. 9      |
| Mo-W-P                                                            | 0                                                    | –                   | 101              | 52                   | 8 h          | Ref. 10     |
| Ni <sub>0.33</sub> Co <sub>0.67</sub> S <sub>2</sub> NWs          | 0                                                    | –                   | 88               | 44.1                 | < 3 h        | Ref. 11     |
| CoSP/CNTs                                                         | 0                                                    | –                   | 65               | 55                   | 24 h         | Ref. 12     |
| CoPS NPs                                                          | 0                                                    | –                   | 65               | 56                   | 35 h         | Ref. 13     |
| NiCoP/rGO                                                         | 0                                                    | –                   | 55               | 45.2                 | 18 h         | Ref. 14     |
| PANI/CoP                                                          | 0                                                    | –                   | 70               | 34.5                 | 30 h         | Ref. 15     |
| CoP/Co-MoF                                                        | 0                                                    | –                   | 33               | 43                   | 17 h         | Ref. 16     |
| CoP <sub>2</sub>                                                  | 0                                                    | –                   | 53               | 32                   | 36 h         | Ref. 17     |
| Pt <sub>tripods</sub> @PAA                                        | 79                                                   | ~ 4 nm              | 0                | 26                   | 1.67 h       | Ref. 18     |
| Pt/MoS <sub>2</sub>                                               | 18                                                   | Atomic-size         | >150             | 96                   | 5000 cycles  | Ref. 19     |
| PtSA-NT-NF                                                        | 140                                                  | Atomic-size         | 46               | 30                   | 24 h         | Ref. 20     |
| ALD50Pt/NGNs                                                      | 1.1                                                  | Atomic-size         | 54               | 29                   | 1000 cycles  | Ref. 21     |
| Pt-GDY2                                                           | 4.65                                                 | Atomic-size         | 92               | 46.6                 | 2.78 h       | Ref. 22     |
| Pt-MoS <sub>2</sub>                                               | 7.0                                                  | Atomic-size         | 47               | 25.0                 | 35 h         | Ref. 23     |
| AL-Pt/Pd <sub>3</sub> Pb                                          | 1.6                                                  | Atomic-size         | 17               | 18                   | 25 h         | Ref. 24     |
| Pt SA/m-WO <sub>3-x</sub>                                         | 0.86                                                 | Atomic-size         | 76               | 45                   | 10 h         | Ref. 25     |
| Pt SASs/AG                                                        | 31                                                   | Atomic-size         | 19               | 29.3                 | 24 h         | Ref. 26     |
| Mo <sub>2</sub> TiC <sub>2</sub> T <sub>x</sub> -Pt <sub>SA</sub> | 12                                                   | Atomic-size         | 43               | 30                   | 100 h        | Ref. 27     |
| Pt <sub>1</sub> /OLC                                              | 1.37                                                 | Atomic-size         | 55               | 36                   | 100 h        | Ref. 28     |
| Pt/Co <sub>0.85</sub> Se                                          | 204                                                  | Atomic-size         | 60               | 26                   | 40 h         | Ref. 29     |
| Rh-MoS <sub>2</sub>                                               | 24                                                   | Atomic-size         | 90               | 54                   | 20 h         | Ref. 30     |
| Pt-SA/MoO <sub>x</sub>                                            | 1.68                                                 | Atomic-size         | 18               | 123                  | 20 h         | Ref. 31     |
| Pt-PVP/TNR                                                        | 21.9                                                 | Atomic-size         | 27               | 27                   | 44 h         | Ref. 32     |
| Pt/PCM                                                            | 113                                                  | Atomic-size         | 142              | 65.3                 | 5 h          | Ref. 33     |
| RuCoP                                                             | 60                                                   | Atomic-size         | 25               | 31                   | 150 h        | Ref. 34     |
| Ir@CON                                                            | 500                                                  | ~ 2.29 nm           | 16               | 27.0                 | 10000 cycles | Ref. 35     |

232 **Supplementary Table 5.** Comparison of HER performance of Pt<sub>2</sub>Ir<sub>1</sub>/CoP with the previously reported  
233 HSBB electrocatalysts in acid media.

| Catalyst                             | Loading of noble metal [ $\mu\text{g}/\text{cm}^2$ ] | $\eta_{20}$ [mV] | Tafel slope [mV/dec] | Durability  | Suppl. Ref. |
|--------------------------------------|------------------------------------------------------|------------------|----------------------|-------------|-------------|
| Pt <sub>2</sub> Ir <sub>1</sub> /CoP | 0.6                                                  | 7                | 25.2                 | 500 h       | This work   |
| Pt/RuCeO <sub>2</sub>                | 1.9                                                  | 72               | 31                   | 8 h         | Ref. 36     |
| Pt SA/m-WO <sub>3-x</sub>            | 0.86                                                 | 76               | 45                   | 10 h        | Ref. 25     |
| Pt-WO <sub>3</sub>                   | —                                                    | 52               | 32.9                 | 5000 cycles | Ref. 37     |
| Rh/SiNW                              | 56                                                   | 81               | 24                   | 138 h       | Ref. 1      |
| Ir/SiNW                              | 60                                                   | 22               | 20                   | 14 h        | Ref. 38     |
| Rh/MoS <sub>2</sub>                  | 16                                                   | 47               | 24                   | 22.2        | Ref. 2      |
| Pt/WO <sub>3</sub>                   | 16                                                   | 42               | 73                   | 19.4 h      | Ref. 39     |
| WO <sub>2</sub> /WS <sub>2</sub>     | 0                                                    | 100              | 54                   | 3.1 h       | Ref. 40     |
| EG-Pt/CoP-1.5                        | 1.5                                                  | 21               | 42.5                 | 100 h       | Ref. 41     |

234

235

236

237

238

239

240

241

242

243

244

245

246

247

248

249

250

251

252

**Supplementary Table 6.** Comparison of HER activity in H<sub>2</sub>-saturated 0.5 M H<sub>2</sub>SO<sub>4</sub> electrolyte for Pt<sub>2</sub>Ir<sub>1</sub>/CoP with the state-of-the-art HER electrocatalysts, especially Pt-based catalysts.

253

| Catalyst                                                 | Loading of noble metal [ $\mu\text{g}/\text{cm}^2$ ] | Size of noble metal | $\eta_{20}$ [mV] | Tafel slope [mV/dec] | Suppl. Ref. |
|----------------------------------------------------------|------------------------------------------------------|---------------------|------------------|----------------------|-------------|
| Pt <sub>2</sub> Ir <sub>1</sub> /CoP                     | 0.6                                                  | ~ 1.6 nm            | 9                | 25.0                 | This work   |
| Ni <sub>2</sub> P NPs                                    | 0                                                    | —                   | 130              | 46                   | Ref. 7      |
| Ni <sub>0.33</sub> Co <sub>0.67</sub> S <sub>2</sub> NWs | 0                                                    | —                   | 88               | 44.1                 | Ref. 11     |
| CoPS NPs                                                 | 0                                                    | —                   | 65               | 56                   | Ref. 13     |
| B-doped CoP                                              | 0                                                    | —                   | 58               | 50                   | Ref. 42     |
| CoP/Co-MoF                                               | 0                                                    | —                   | 33               | 43                   | Ref. 16     |
| CoP <sub>2</sub>                                         | 0                                                    | —                   | 53               | 32                   | Ref. 17     |
| AL-Pt/Pd <sub>3</sub> Pb                                 | 1.6                                                  | Atomic-size         | 17               | 18                   | Ref. 24     |
| Pt SA/m-WO <sub>3-x</sub>                                | 0.86                                                 | Atomic-size         | 76               | 45                   | Ref. 25     |
| Pt <sub>1</sub> /OLC                                     | 1.37                                                 | Atomic-size         | 55               | 36                   | Ref. 28     |
| A-CoPt-NC                                                | 0.419                                                | Atomic-size         | 32               | 31                   | Ref. 43     |
| K <sub>2</sub> PtCl <sub>4</sub> @NC-M                   | 5.6                                                  | Atomic-size         | 15               | 21                   | Ref. 44     |
| Pt <sub>1</sub> /MC                                      | 0.26                                                 | Atomic-size         | 32               | 26                   | Ref. 45     |
| Pt-PVP/TNR                                               | 21.9                                                 | Atomic-size         | 27               | 27                   | Ref. 32     |
| Mo <sub>2</sub> TiC <sub>2</sub> T <sub>x</sub> -PtSA    | 12                                                   | Atomic-size         | 43               | 30                   | Ref. 27     |
| Pt-MoS <sub>2</sub>                                      | 7.0                                                  | Atomic-size         | 47               | 25.0                 | Ref. 46     |
| Pt-WO <sub>3</sub>                                       | —                                                    | Atomic-size         | 52               | 32.9                 | Ref. 37     |
| RuCoP                                                    | 60                                                   | Atomic-size         | 25               | 31                   | Ref. 34     |
| RuP <sub>2</sub> @NPC                                    | 233                                                  | Atomic-size         | 59               | 38                   | Ref. 47     |

254

255

**Supplementary Table 7.** The fitted parameters of the EIS data of bare CoP, Pt/CoP, Ir/CoP, Pt<sub>2</sub>Ir<sub>1</sub>/CoP, Pt/rGO, Pt<sub>2</sub>Ir<sub>1</sub>/rGO, SCN-Pt/CoP and SCN-Pt<sub>2</sub>Ir<sub>1</sub>/CoP for HER.

| Catalysts     | $\eta$ [mV] | $R_s$ [ $\Omega$ ] | $T$ [F s <sup>n-1</sup> ] | $R_1$ [ $\Omega$ ] | $n_1$ | $R_2$ [ $\Omega$ ] | $C_\phi$ [F] |
|---------------|-------------|--------------------|---------------------------|--------------------|-------|--------------------|--------------|
| <b>CoP</b>    | 0           | 3.58               | 0.0041                    | 21.1               | 0.86  | 9120               | 0.0018       |
|               | -10         | 3.68               | 0.0039                    | 21.0               | 0.90  | 7762               | 0.0024       |
|               | -20         | 3.63               | 0.0043                    | 20.9               | 0.87  | 6310               | 0.0026       |
|               | -30         | 3.61               | 0.0042                    | 20.8               | 0.83  | 5370               | 0.0032       |
|               | -40         | 3.64               | 0.0045                    | 20.4               | 0.81  | 4266               | 0.004        |
|               | -50         | 3.59               | 0.0044                    | 19.8               | 0.90  | 3162               | 0.007        |
|               | -60         | 3.65               | 0.0042                    | 17.7               | 0.91  | 2512               | 0.010        |
|               | -70         | 3.61               | 0.0044                    | 16.7               | 0.85  | 2138               | 0.0132       |
|               | -80         | 3.66               | 0.0042                    | 15.8               | 0.86  | 1549               | 0.0145       |
|               | -90         | 3.57               | 0.0041                    | 15.0               | 0.88  | 1191               | 0.0172       |
|               | -100        | 3.61               | 0.0045                    | 14.6               | 0.83  | 879                | 0.0203       |
|               | -110        | 3.63               | 0.0046                    | 13.9               | 0.89  | 616                | 0.0224       |
|               | -120        | 3.60               | 0.0038                    | 12.8               | 0.92  | 340                | 0.024        |
|               | -130        | 3.54               | 0.0045                    | 12.0               | 0.91  | 160                | 0.026        |
| -140          | 3.61        | 0.0041             | 11.4                      | 0.81               | –     | –                  |              |
| <b>Pt/CoP</b> | 0           | 3.58               | 0.0058                    | 24.1               | 0.82  | 8912               | 0.0015       |
|               | -10         | 3.62               | 0.0062                    | 24.0               | 0.91  | 6310               | 0.0025       |
|               | -20         | 3.57               | 0.0061                    | 23.7               | 0.87  | 4786               | 0.004        |
|               | -30         | 3.56               | 0.0058                    | 24.0               | 0.86  | 3715               | 0.0063       |
|               | -40         | 3.55               | 0.006                     | 23.1               | 0.9   | 3020               | 0.0093       |
|               | -50         | 3.51               | 0.0054                    | 22.8               | 0.91  | 2042               | 0.013        |
|               | -60         | 3.56               | 0.0059                    | 21.0               | 0.83  | 1514               | 0.016        |
|               | -70         | 3.50               | 0.0064                    | 20.7               | 0.88  | 1000               | 0.017        |
|               | -80         | 3.51               | 0.0061                    | 20.4               | 0.87  | 735                | 0.018        |
|               | -90         | 3.49               | 0.006                     | 19.8               | 0.93  | 588                | 0.019        |
|               | -100        | 3.63               | 0.0064                    | 19.2               | 0.91  | 410                | 0.02         |
|               | -110        | 3.62               | 0.0058                    | 18.8               | 0.90  | 299                | 0.021        |
|               | -120        | 3.55               | 0.0051                    | 18.3               | 0.87  | 201                | 0.022        |
|               | -130        | 3.59               | 0.0065                    | 18.0               | 0.86  | 109                | 0.0222       |

|                   |      |      |        |      |      |      |        |
|-------------------|------|------|--------|------|------|------|--------|
|                   | -140 | 3.60 | 0.0062 | 17.3 | 0.82 | –    | –      |
| <b>Ir/CoP</b>     | 0    | 3.52 | 0.0040 | 24.4 | 0.83 | 8886 | 0.0019 |
|                   | -10  | 3.61 | 0.0042 | 24.1 | 0.91 | 6405 | 0.0025 |
|                   | -20  | 3.62 | 0.0041 | 23.7 | 0.85 | 4766 | 0.0027 |
|                   | -30  | 3.60 | 0.0043 | 23.4 | 0.86 | 3691 | 0.0031 |
|                   | -40  | 3.62 | 0.0043 | 23.0 | 0.87 | 3002 | 0.0042 |
|                   | -50  | 3.57 | 0.0046 | 22.9 | 0.85 | 2112 | 0.0071 |
|                   | -60  | 3.58 | 0.0044 | 22.0 | 0.88 | 1466 | 0.0102 |
|                   | -70  | 3.63 | 0.0041 | 21.7 | 0.82 | 999  | 0.0145 |
|                   | -80  | 3.51 | 0.0040 | 21.4 | 0.85 | 740  | 0.0190 |
|                   | -90  | 3.54 | 0.0045 | 20.8 | 0.86 | 566  | 0.0218 |
|                   | -100 | 3.62 | 0.0043 | 20.2 | 0.88 | 406  | 0.0235 |
|                   | -110 | 3.60 | 0.0046 | 19.7 | 0.90 | 302  | 0.0245 |
|                   | -120 | 3.58 | 0.0040 | 19.0 | 0.83 | 198  | 0.0255 |
|                   | -130 | 3.57 | 0.0039 | 18.1 | 0.86 | 110  | 0.0266 |
|                   | -140 | 3.56 | 0.0042 | 17.5 | 0.88 | –    | –      |
| <b>Pt/C</b>       | 0    | 3.42 | 0.0025 | 35.2 | 0.90 | 5623 | 0.0001 |
|                   | -10  | 3.51 | 0.0031 | 34.7 | 0.81 | 3630 | 0.0002 |
|                   | -20  | 3.50 | 0.0027 | 34.3 | 0.83 | 2570 | 0.0007 |
|                   | -30  | 3.55 | 0.0039 | 34.2 | 0.83 | 2089 | 0.0016 |
|                   | -40  | 3.53 | 0.0033 | 33.8 | 0.85 | 1380 | 0.0027 |
|                   | -50  | 3.51 | 0.0031 | 33.3 | 0.82 | 1023 | 0.0037 |
|                   | -60  | 3.49 | 0.0028 | 32.9 | 0.85 | 676  | 0.0047 |
|                   | -70  | 3.46 | 0.0037 | 32.1 | 0.92 | 389  | 0.0055 |
|                   | -80  | 3.51 | 0.0036 | 31.6 | 0.91 | 239  | 0.0061 |
|                   | -90  | 3.42 | 0.0035 | 31.0 | 0.90 | 125  | 0.0065 |
|                   | -100 | 3.44 | 0.0038 | 30.4 | 0.92 | –    | –      |
| <b>SCN-Pt/CoP</b> | 0    | 3.61 | 0.0055 | 25.1 | 0.91 | 8912 | 0.0018 |
|                   | -10  | 3.58 | 0.0051 | 24.6 | 0.85 | 7244 | 0.0018 |
|                   | -20  | 3.62 | 0.0057 | 24.2 | 0.86 | 5495 | 0.0020 |
|                   | -30  | 3.60 | 0.0049 | 24.1 | 0.86 | 4466 | 0.0028 |
|                   | -40  | 3.65 | 0.0053 | 23.7 | 0.88 | 3467 | 0.0033 |

|                                             |      |        |        |      |      |        |        |
|---------------------------------------------|------|--------|--------|------|------|--------|--------|
| -50                                         | 3.62 | 0.0051 | 23.2   | 0.87 | 2570 | 0.0054 |        |
| -60                                         | 3.58 | 0.0058 | 22.8   | 0.81 | 1995 | 0.0097 |        |
| -70                                         | 3.54 | 0.0057 | 22.2   | 0.89 | 1479 | 0.014  |        |
| -80                                         | 3.55 | 0.0056 | 21.7   | 0.88 | 1149 | 0.015  |        |
| -90                                         | 3.66 | 0.0054 | 21.2   | 0.92 | 891  | 0.018  |        |
| -100                                        | 3.67 | 0.0049 | 20.5   | 0.81 | 660  | 0.021  |        |
| -110                                        | 3.60 | 0.0052 | 20.0   | 0.80 | 457  | 0.023  |        |
| -120                                        | 3.59 | 0.0053 | 19.6   | 0.83 | 281  | 0.025  |        |
| -130                                        | 3.61 | 0.0058 | 19.2   | 0.86 | 141  | 0.026  |        |
| -140                                        | 3.67 | 0.0056 | 18.7   | 0.80 | –    | –      |        |
| <hr/>                                       |      |        |        |      |      |        |        |
| <b>Pt<sub>2</sub>Ir<sub>1</sub>/CoP</b>     | 0    | 3.52   | 0.0060 | 24.9 | 0.90 | 4365.2 | 0.007  |
|                                             | -10  | 3.51   | 0.0054 | 24.2 | 0.92 | 2512   | 0.019  |
|                                             | -20  | 3.55   | 0.0055 | 23.6 | 0.81 | 1621.8 | 0.051  |
|                                             | -30  | 3.56   | 0.0056 | 23.5 | 0.80 | 891.3  | 0.066  |
|                                             | -40  | 3.61   | 0.0057 | 23.0 | 0.85 | 512.9  | 0.081  |
|                                             | -50  | 3.62   | 0.0059 | 22.6 | 0.82 | 263.2  | 0.088  |
|                                             | -60  | 3.49   | 0.0062 | 22.0 | 0.81 | 77.6   | 0.096  |
|                                             | -70  | 3.50   | 0.0061 | 21.4 | 0.83 | –      | –      |
| <hr/>                                       |      |        |        |      |      |        |        |
| <b>Pt<sub>2</sub>Ir<sub>1</sub>/C</b>       | 0    | 3.51   | 0.0035 | 36.4 | 0.91 | 4677   | 0.0001 |
|                                             | -10  | 3.53   | 0.0030 | 35.9 | 0.82 | 3020   | 0.0007 |
|                                             | -20  | 3.54   | 0.0037 | 35.5 | 0.82 | 2188   | 0.0024 |
|                                             | -30  | 3.45   | 0.0029 | 35.4 | 0.82 | 1259   | 0.0037 |
|                                             | -40  | 3.46   | 0.0023 | 35.0 | 0.86 | 871    | 0.0048 |
|                                             | -50  | 3.55   | 0.0035 | 34.5 | 0.83 | 646    | 0.0058 |
|                                             | -60  | 3.57   | 0.0038 | 34.1 | 0.83 | 389    | 0.0065 |
|                                             | -70  | 3.53   | 0.0027 | 33.9 | 0.90 | 246    | 0.0069 |
|                                             | -80  | 3.50   | 0.0034 | 32.8 | 0.93 | 100    | 0.0072 |
|                                             | -90  | 3.47   | 0.0036 | 32.2 | 0.91 | –      | –      |
| <hr/>                                       |      |        |        |      |      |        |        |
| <b>SCN-Pt<sub>2</sub>Ir<sub>1</sub>/CoP</b> | 0    | 3.42   | 0.0045 | 26.3 | 0.81 | 9549   | 0.0010 |
|                                             | -10  | 3.51   | 0.0041 | 25.8 | 0.95 | 8511   | 0.0012 |
|                                             | -20  | 3.52   | 0.0047 | 25.5 | 0.82 | 6918   | 0.0017 |
|                                             | -30  | 3.50   | 0.0039 | 25.3 | 0.81 | 5888   | 0.0020 |



|      |      |        |      |      |      |        |
|------|------|--------|------|------|------|--------|
| -40  | 3.55 | 0.0043 | 24.9 | 0.80 | 4786 | 0.0038 |
| -50  | 3.52 | 0.0055 | 24.4 | 0.82 | 3631 | 0.0064 |
| -60  | 3.49 | 0.0049 | 23.9 | 0.83 | 2951 | 0.011  |
| -70  | 3.44 | 0.0047 | 23.4 | 0.86 | 2290 | 0.013  |
| -80  | 3.45 | 0.0046 | 22.9 | 0.82 | 1659 | 0.016  |
| -90  | 3.56 | 0.0044 | 22.4 | 0.82 | 1258 | 0.019  |
| -100 | 3.57 | 0.0047 | 21.7 | 0.91 | 851  | 0.021  |
| -110 | 3.50 | 0.0051 | 21.2 | 0.90 | 616  | 0.024  |
| -120 | 3.49 | 0.0050 | 20.8 | 0.93 | 338  | 0.025  |
| -130 | 3.51 | 0.0052 | 20.2 | 0.85 | 169  | 0.026  |
| -140 | 3.57 | 0.0051 | 19.6 | 0.90 | —    | —      |

---

258

259

260 **Supplementary References:**

- 261 1 Zhu, L. *et al.* A rhodium/silicon co-electrocatalyst design concept to surpass platinum  
262 hydrogen evolution activity at high overpotentials. *Nat. Commun.* **7**, 12272 (2016).
- 263 2 Cheng, Y. *et al.* Rh/MoS<sub>2</sub> Nanocomposite catalysts with Pt-like activity for hydrogen  
264 evolution reaction. *Adv. Funct. Mater.* **27**, 1700359 (2017).
- 265 3 Zhang, G., Zang, S. & Wang, X. Layered Co(OH)<sub>2</sub> deposited polymeric carbon nitrides  
266 for photocatalytic water oxidation. *ACS Catal.* **5**, 941-947 (2015).
- 267 4 Zhang, G. *et al.* Highly active and stable catalysts of phytic acid-derivative transition  
268 metal phosphides for full water splitting. *J. Am. Chem. Soc.* **138**, 14686-14693 (2016).
- 269 5 El Sawy, E. N., Handal, H. T., Thangadurai, V. & Birss, V. I. Pt<sub>x</sub>Ir<sub>y</sub> alloy nanoparticles  
270 with fully tunable bulk and surface compositions. *J. Mater. Chem. A* **4**, 15400-15410  
271 (2016).
- 272 6 Berlowitz, P. J., Peden, C. H. & Goodman, D. W. Kinetics of carbon monoxide oxidation  
273 on single-crystal palladium, platinum, and iridium. *J. Phys. Chem.* **92**, 5213-5221 (1988).
- 274 7 Popczun, E. J. *et al.* Nanostructured nickel phosphide as an electrocatalyst for the  
275 hydrogen evolution reaction. *J. Am. Chem. Soc.* **135**, 9267-9270 (2013).
- 276 8 Tian, J., Liu, Q., Asiri, A. M. & Sun, X. Self-supported nanoporous cobalt phosphide  
277 nanowire arrays: an efficient 3D hydrogen-evolving cathode over the wide range of pH 0–  
278 14. *J. Am. Chem. Soc.* **136**, 7587-7590 (2014).
- 279 9 Tan, Y. *et al.* Versatile nanoporous bimetallic phosphides towards electrochemical water  
280 splitting. *Energy Environ. Sci.* **9**, 2257-2261 (2016).
- 281 10 Wang, X.-D. *et al.* Novel porous molybdenum tungsten phosphide hybrid nanosheets on  
282 carbon cloth for efficient hydrogen evolution. *Energy Environ. Sci.* **9**, 1468-1475 (2016).
- 283 11 Peng, Z., Jia, D., Al-Enizi, A. M., Elzatahry, A. A. & Zheng, G. From water oxidation to  
284 reduction: homologous Ni–Co based nanowires as complementary water splitting  
285 electrocatalysts. *Adv. Energy Mater.* **5**, 1402031 (2015).
- 286 12 Liu, W. *et al.* A highly active and stable hydrogen evolution catalyst based on pyrite-  
287 structured cobalt phosphosulfide. *Nat. Commun.* **7**, 10771 (2016).
- 288 13 Cabán-Acevedo, M. *et al.* Efficient hydrogen evolution catalysis using ternary pyrite-type  
289 cobalt phosphosulphide. *Nat. Mater.* **14**, 1245 (2015).
- 290 14 Li, J. *et al.* Mechanistic insights on ternary Ni<sub>2-x</sub>Co<sub>x</sub>P for hydrogen evolution and their  
291 hybrids with graphene as highly efficient and robust catalysts for overall water splitting.  
292 *Adv. Funct. Mater.* **26**, 6785-6796 (2016).

- 293 15 Feng, J.-X., Tong, S.-Y., Tong, Y.-X. & Li, G.-R. Pt-like hydrogen evolution  
294 electrocatalysis on PANI/CoP hybrid nanowires by weakening the shackles of hydrogen  
295 ions on the surfaces of catalysts. *J. Am. Chem. Soc.* **140**, 5118-5126 (2018).
- 296 16 Liu, T. *et al.* CoP-doped MOF-based electrocatalyst for pH-universal hydrogen evolution  
297 reaction. *Angew. Chem. Int. Edit.* **58**, 4679-4684 (2019).
- 298 17 Li, H. *et al.* Phosphorus-rich colloidal cobalt diphosphide (CoP<sub>2</sub>) Nanocrystals for  
299 electrochemical and photoelectrochemical hydrogen evolution. *Adv. Mater.* **31**, 1900813  
300 (2019).
- 301 18 Xu, G.-R. *et al.* Polyallylamine-functionalized platinum tripods: enhancement of  
302 hydrogen evolution reaction by proton carriers. *ACS Catal.* **7**, 452-458 (2016).
- 303 19 Deng, J. *et al.* Triggering the electrocatalytic hydrogen evolution activity of the inert two-  
304 dimensional MoS<sub>2</sub> surface via single-atom metal doping. *Energy Environ. Sci.* **8**, 1594-  
305 1601 (2015).
- 306 20 Luo, J., Zhang, L., Han, L., Liu, H. & Liu, X. Potential-cycling synthesis of single Pt  
307 atoms for efficient hydrogen evolution in neutral media. *Angew. Chem. Int. Edit.* **56**,  
308 13694 (2017).
- 309 21 Cheng, N. *et al.* Platinum single-atom and cluster catalysis of the hydrogen evolution  
310 reaction. *Nat. Commun.* **7** 13638 (2016).
- 311 22 Yin, X.-P. *et al.* Engineering the coordination environment of single-atom platinum  
312 anchored on graphdiyne for optimizing electrocatalytic hydrogen evolution. *Angew. Chem.*  
313 *Int. Edit.* **57**, 9382-9386 (2018).
- 314 23 Chen, Z. *et al.* Interface confined hydrogen evolution reaction in zero valent metal  
315 nanoparticles-intercalated molybdenum disulfide. *Nat. Commun.* **8**, 14548 (2017).
- 316 24 Yao, Y. *et al.* Engineering the electronic structure of submonolayer Pt on intermetallic  
317 Pd<sub>3</sub>Pb via charge transfer boosts the hydrogen evolution reaction. *J. Am. Chem. Soc.* **141**,  
318 19964-19968, (2019).
- 319 25 Park, J. *et al.* Investigation of the support effect in atomically dispersed Pt on WO<sub>3-x</sub> for  
320 utilization of Pt in the hydrogen evolution reaction. *Angew. Chem. Int. Edit.* **58**, 16038-  
321 16042, (2019).
- 322 26 Ye, S. *et al.* Highly stable single Pt atomic sites anchored on aniline-stacked graphene for  
323 hydrogen evolution reaction. *Energy Environ. Sci.* **12**, 1000-1007 (2019).
- 324 27 Zhang, J. *et al.* Single platinum atoms immobilized on an MXene as an efficient catalyst  
325 for the hydrogen evolution reaction. *Nat. Catal.* **1**, 985-992 (2018).

- 326 28 Liu, D. *et al.* Atomically dispersed platinum supported on curved carbon supports for  
327 efficient electrocatalytic hydrogen evolution. *Nat. Energy* **4**, 512-518 (2019).
- 328 29 Jiang, K. *et al.* Single platinum atoms embedded in nanoporous cobalt selenide as  
329 electrocatalyst for accelerating hydrogen evolution reaction. *Nat. Commun.* **10**, 1743  
330 (2019).
- 331 30 Meng, X. *et al.* Distance synergy of MoS<sub>2</sub>-confined rhodium atoms for highly efficient  
332 hydrogen evolution. *Angew. Chem. Int. Edit.* **59**, 10502 (2020).
- 333 31 Xu, J. *et al.* Amorphous MoO<sub>x</sub>-stabilized single platinum atoms with ultrahigh mass  
334 activity for acidic hydrogen evolution. *Nano Energy* **70**, 104529 (2020).
- 335 32 Li, C. *et al.* Polyvinylpyrrolidone-coordinated single-site platinum catalyst exhibits high  
336 activity for hydrogen evolution reaction. *Angew. Chem. Int. Edit.* **59**, 15902 (2020).
- 337 33 Zhang, H. *et al.* Dynamic traction of lattice-confined platinum atoms into mesoporous  
338 carbon matrix for hydrogen evolution reaction. *Sci. Adv.* **4**, eaao6657 (2018).
- 339 34 Xu, J. *et al.* Boosting the hydrogen evolution performance of ruthenium clusters through  
340 synergistic coupling with cobalt phosphide. *Energy Environ. Sci.* **11**, 1819-1827 (2018).
- 341 35 Mahmood, J. *et al.* Encapsulating iridium nanoparticles inside a 3D cage-like organic  
342 network as an efficient and durable catalyst for the hydrogen evolution reaction. *Adv.*  
343 *Mater.* **30**, 1805606, (2018).
- 344 36 Liu, T. *et al.* Selective loading of atomic platinum on a RuCeO<sub>x</sub> support enables stable  
345 hydrogen evolution at high current densities. *Angew. Chem. Int. Edit.* **59**, 20423 (2020).
- 346 37 Xie, C. *et al.* In-situ phase transition of WO<sub>3</sub> boosting electron and hydrogen transfer for  
347 enhancing hydrogen evolution on Pt. *Nano Energy* **71**, 104653 (2020).
- 348 38 Sheng, M. *et al.* Approaching the volcano top: iridium/silicon nanocomposites as efficient  
349 electrocatalysts for the hydrogen evolution reaction. *ACS Nano* **13**, 2786 (2019).
- 350 39 Tian, H. *et al.* Oxygen vacancy-assisted hydrogen evolution reaction of the Pt/WO<sub>3</sub>  
351 electrocatalyst. *J. Mater. Chem. A* **7**, 6285-6293 (2019).
- 352 40 Yang, L. *et al.* Synergistic WO<sub>3</sub>·2H<sub>2</sub>O nanoplates/WS<sub>2</sub> hybrid catalysts for high-  
353 efficiency hydrogen evolution. *ACS Appl. Mater. Inter.* **8**, 13966-13972 (2016).
- 354 41 Li, J. *et al.* Ethylene-glycol ligand environment facilitates highly efficient hydrogen  
355 evolution of Pt/CoP through proton concentration and hydrogen spillover. *Energy*  
356 *Environ. Sci.* **12**, 2298-2304 (2019).
- 357

- 358 42 Cao, E. *et al.* Boron-induced electronic-structure reformation of CoP nanoparticles drives  
359 enhanced pH-universal hydrogen evolution. *Angew. Chem. Int. Edit.* **59**, 4154-4160  
360 (2020).
- 361 43 Zhang, L. *et al.* Charge polarization from atomic metals on adjacent graphitic layers for  
362 enhancing the hydrogen evolution reaction. *Angew. Chem. Int. Edit.* **58**, 9404-9408 (2019).
- 363 44 Jin, H. *et al.* Simple and scalable mechanochemical synthesis of noble metal catalysts  
364 with single atoms toward highly efficient hydrogen evolution. *Adv. Funct. Mater.* **30**,  
365 2000531 (2020).
- 366 45 Wei, H. *et al.* Iced photochemical reduction to synthesize atomically dispersed metals by  
367 suppressing nanocrystal growth. *Nat. Commun.* **8**, 1-8 (2017).
- 368 46 Chen, Z. *et al.* Interface confined hydrogen evolution reaction in zero valent metal  
369 nanoparticles-intercalated molybdenum disulfide. *Nat. Commun.* **8**, 1-9 (2017).
- 370 47 Pu, Z., Amiin, I. S., Kou, Z., Li, W. & Mu, S. RuP<sub>2</sub>-based catalysts with platinum-like  
371 activity and higher durability for the hydrogen evolution reaction at all pH values. *Angew.*  
372 *Chem. Int. Edit.* **56**, 11559-11564 (2017).
